# Supplementary material
Source: PubMed Central journal article supplement (PMC4876065)
Supplement: JCSM-7-165-s010.pdf [file JCSM-7-165-s010.pdf]

## a GO-term analysis of proteins upregulated in DKO muscle

### $\alpha$ Cellular component

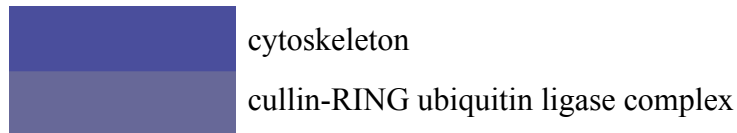

### Color Key

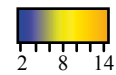

Value

### $\beta$ Molecular function

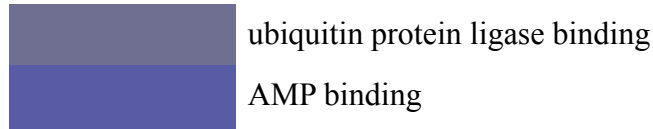

### Color Key

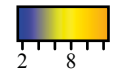

Value

## b GO-term analysis of proteins downregulated in DKO muscle

### $\alpha$ Cellular component

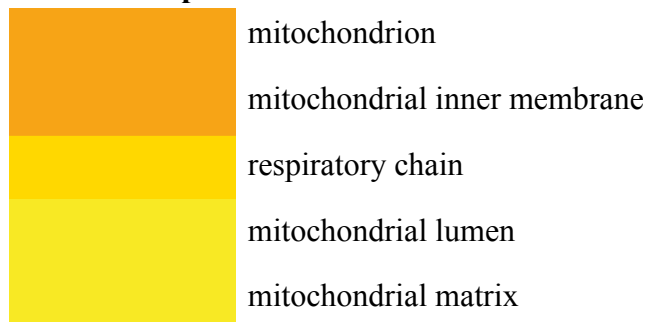

### Color Key

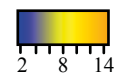

Value

### $\beta$ Molecular function

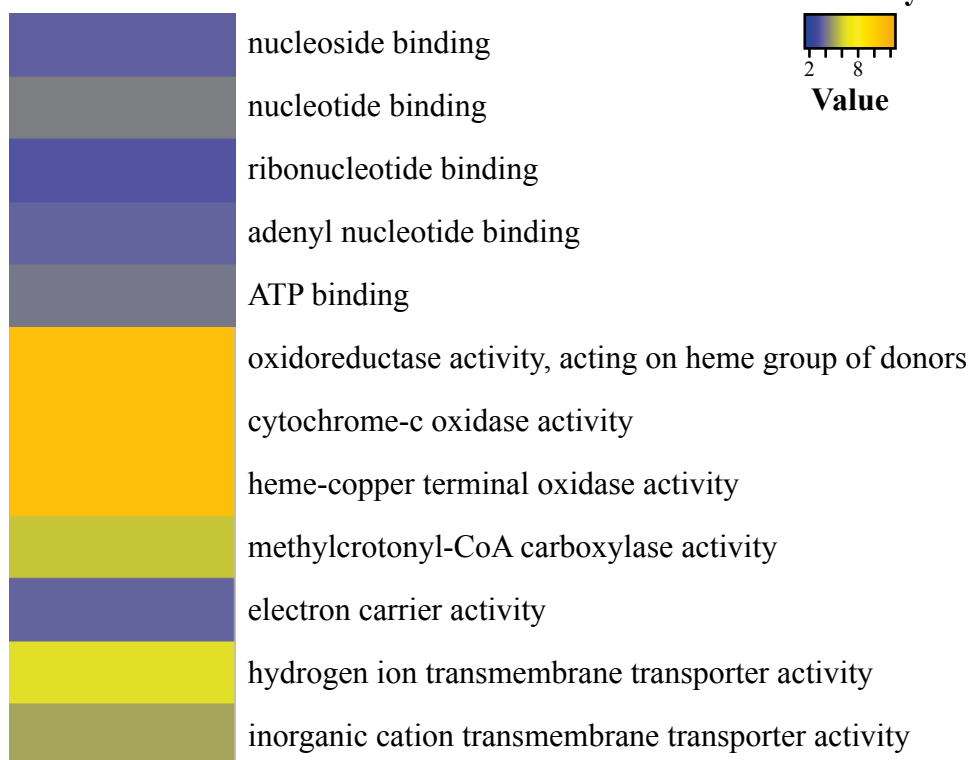

### Color Key

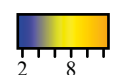

Value
