# Supplementary material
Source: PubMed Central journal article supplement (PMC4876065)

**a**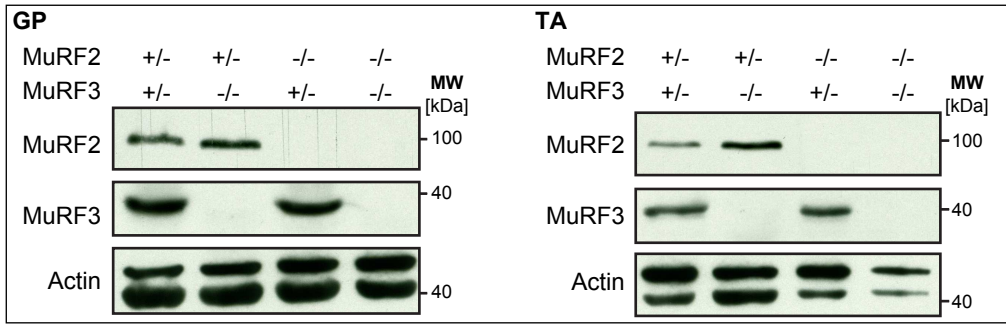**b**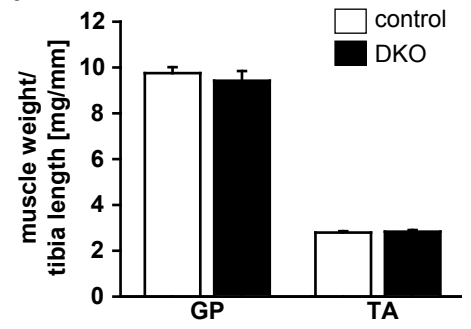**Fig. S1**

Supplement: JCSM-7-165-s002.pdf [file JCSM-7-165-s002.pdf]

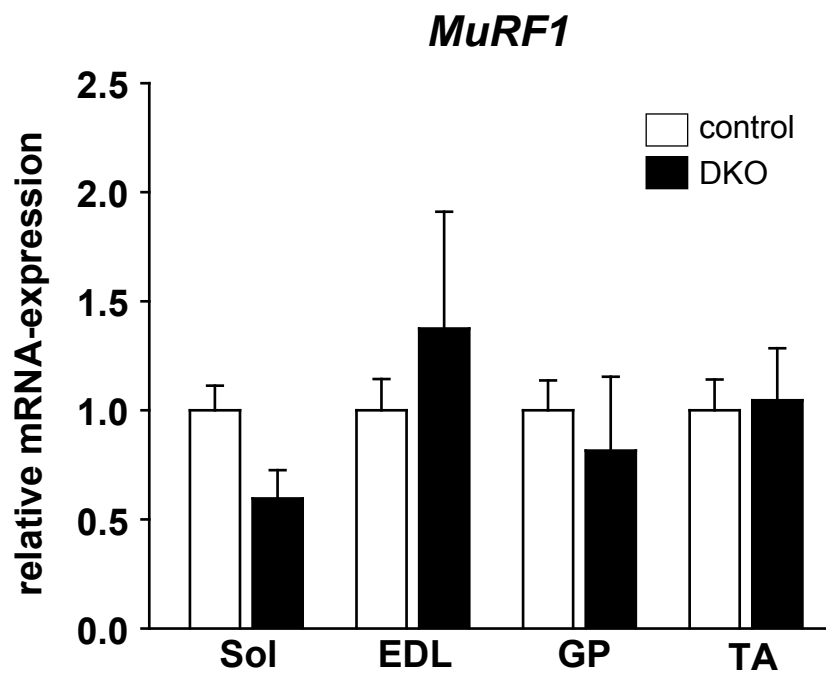

**Fig. S2**

Supplement: JCSM-7-165-s003.pdf [file JCSM-7-165-s003.pdf]

**a**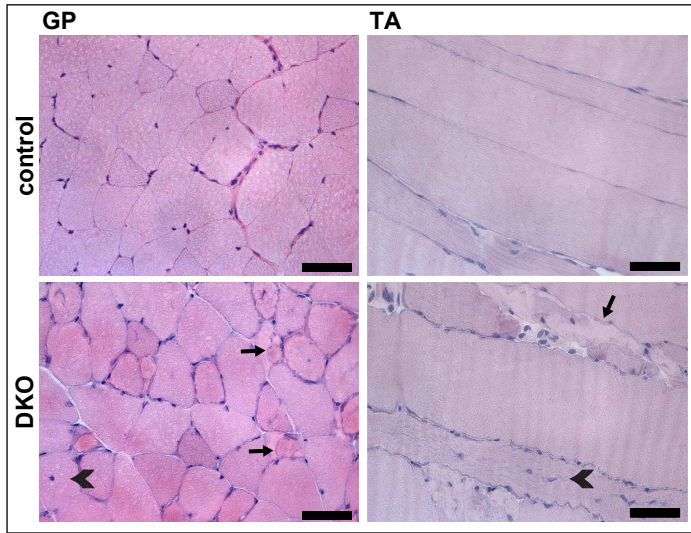**b**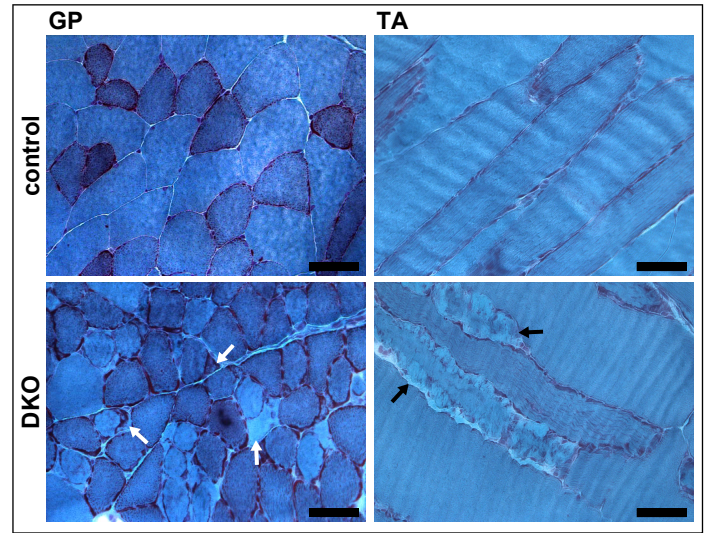**Fig. S3**

Supplement: JCSM-7-165-s004.pdf [file JCSM-7-165-s004.pdf]

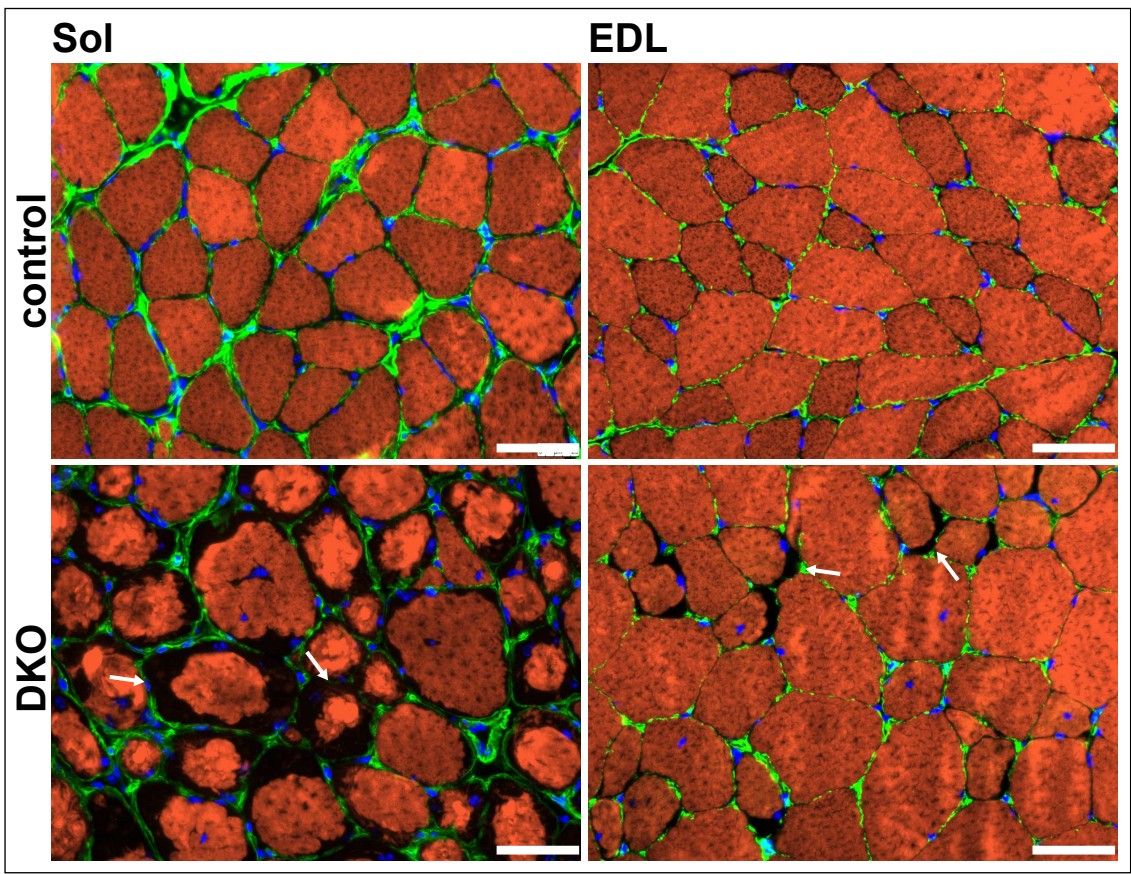

**Fig. S4**

Supplement: JCSM-7-165-s005.pdf [file JCSM-7-165-s005.pdf]

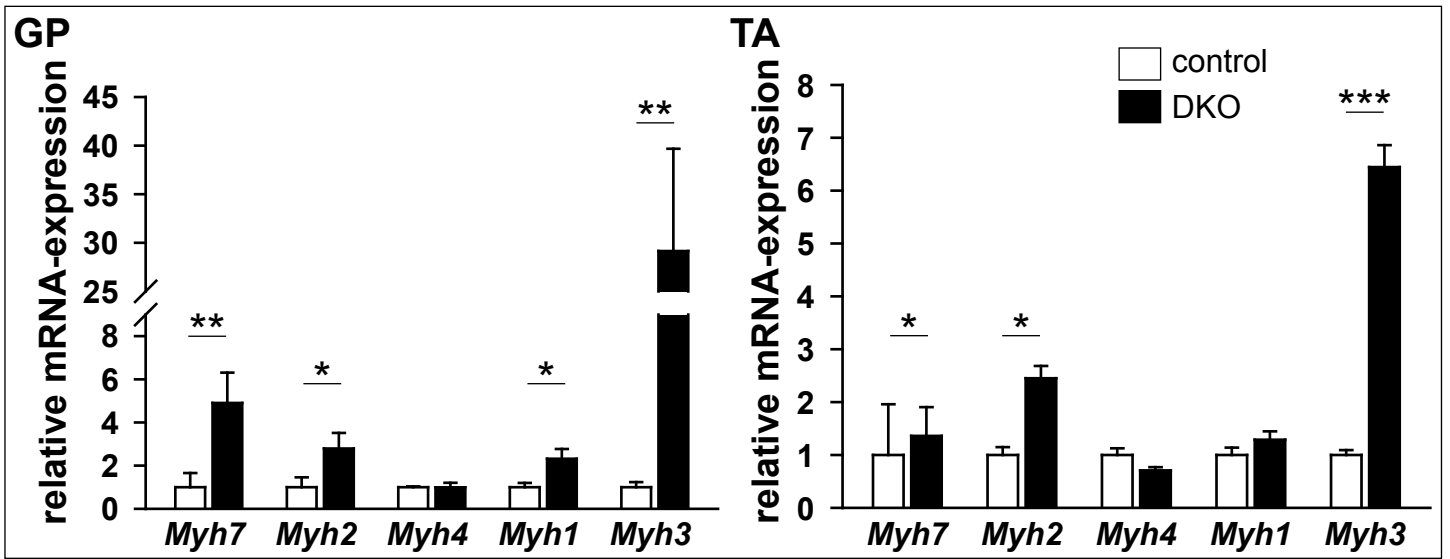

Fig. S5

Supplement: JCSM-7-165-s006.pdf [file JCSM-7-165-s006.pdf]

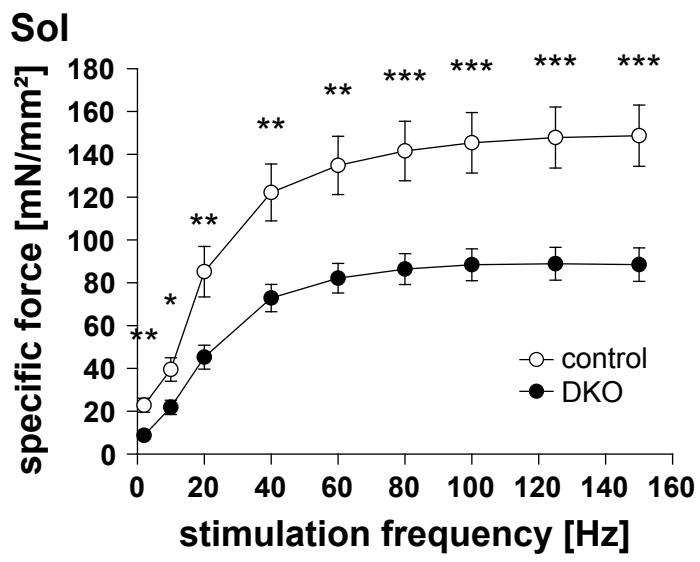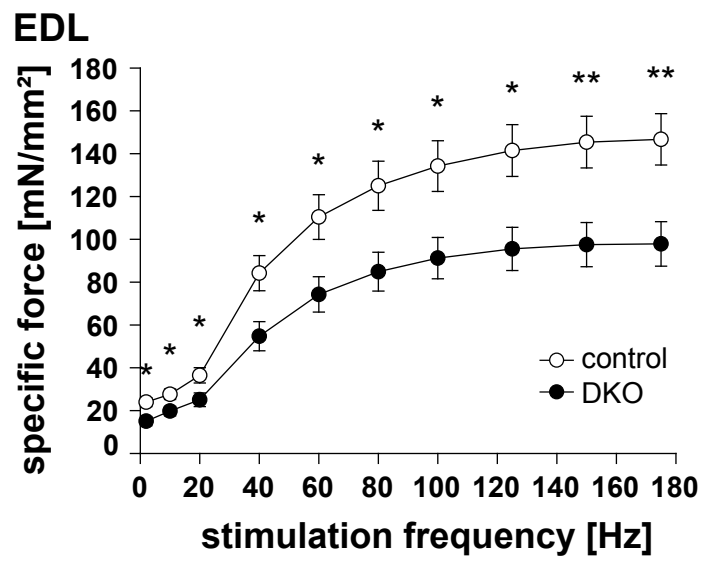

Fig. S6

Supplement: JCSM-7-165-s007.pdf [file JCSM-7-165-s007.pdf]

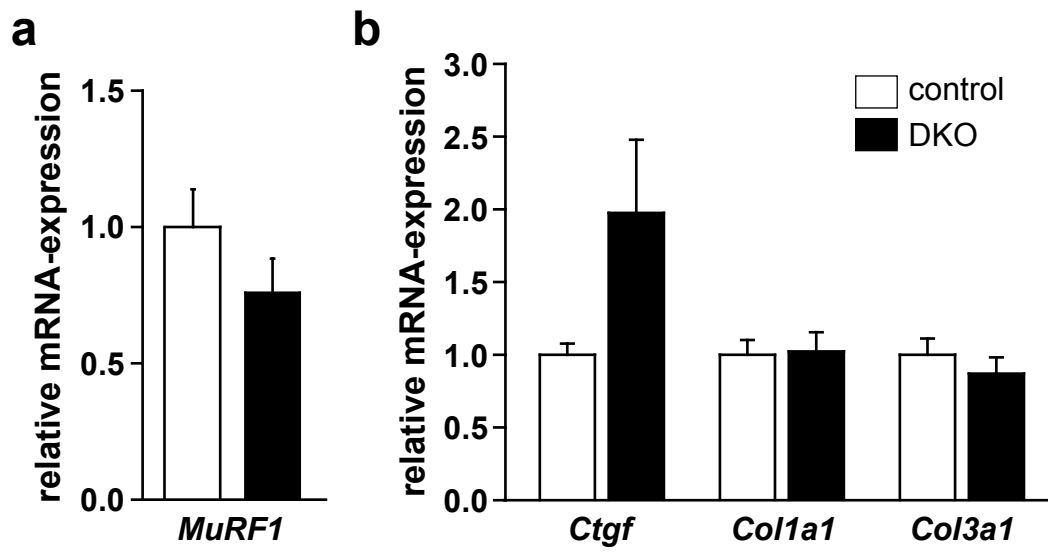

**Fig. S7**

Supplement: JCSM-7-165-s008.pdf [file JCSM-7-165-s008.pdf]

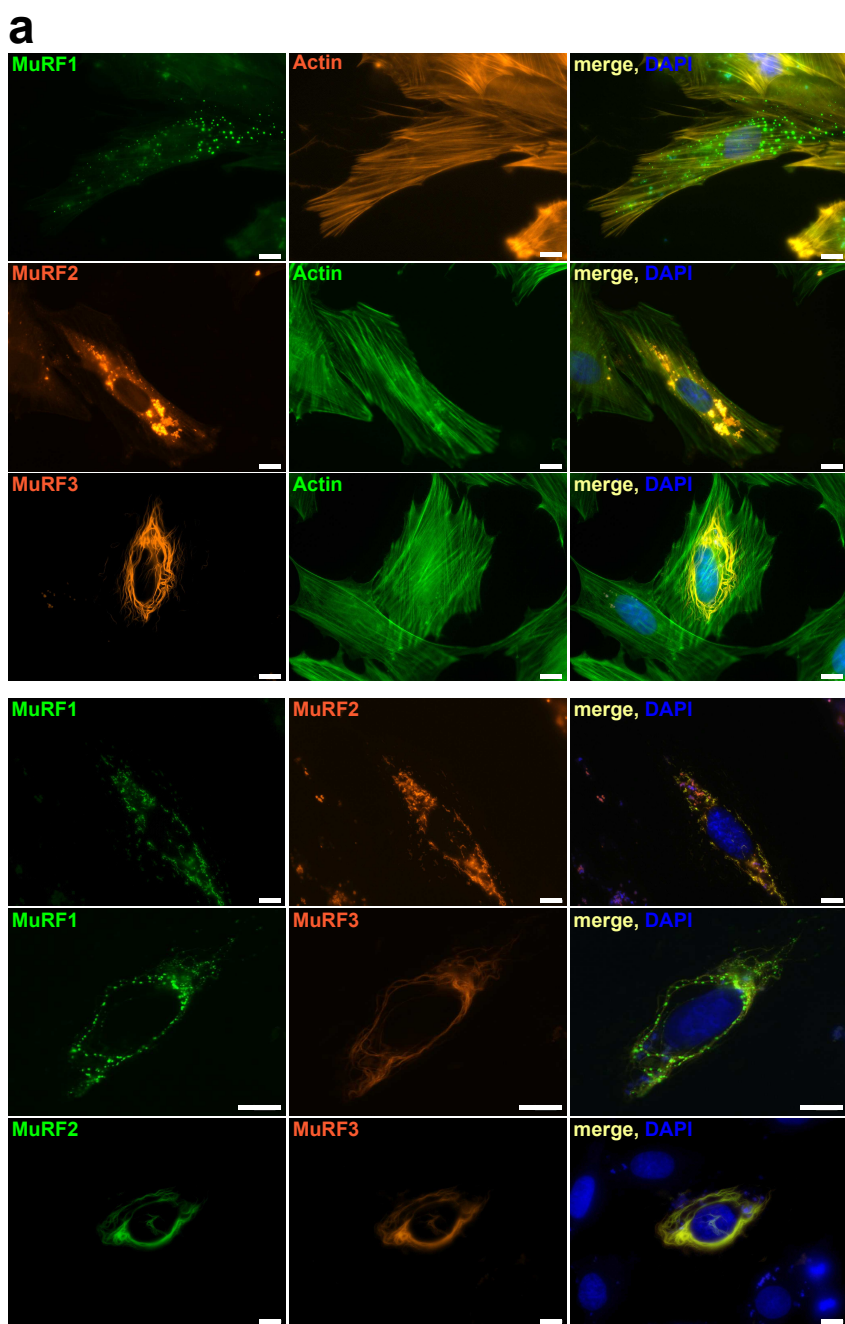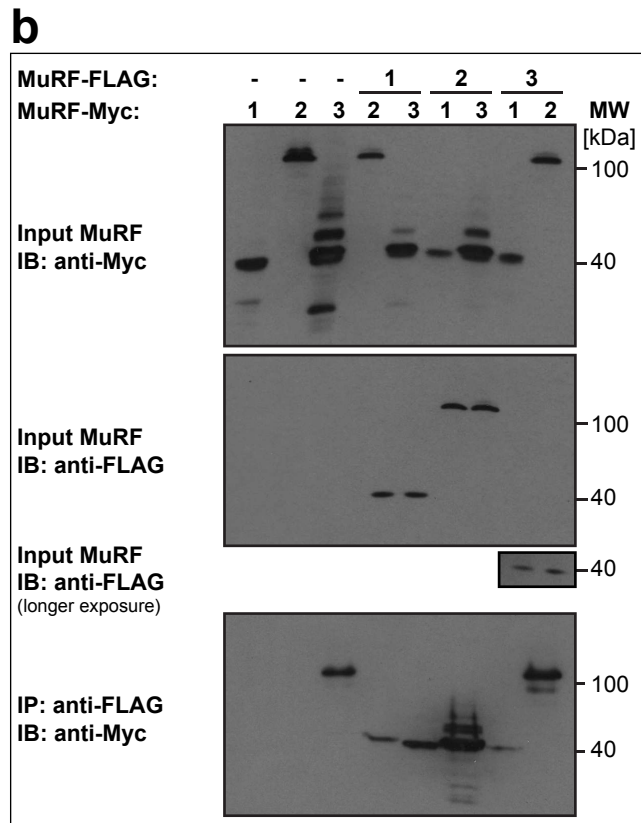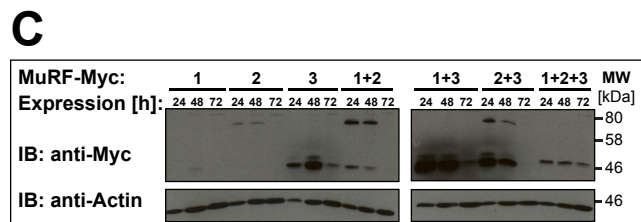

Fig. S8

Supplement: JCSM-7-165-s009.pdf [file JCSM-7-165-s009.pdf]

OXIDATIVE PHOSPHORYLATION

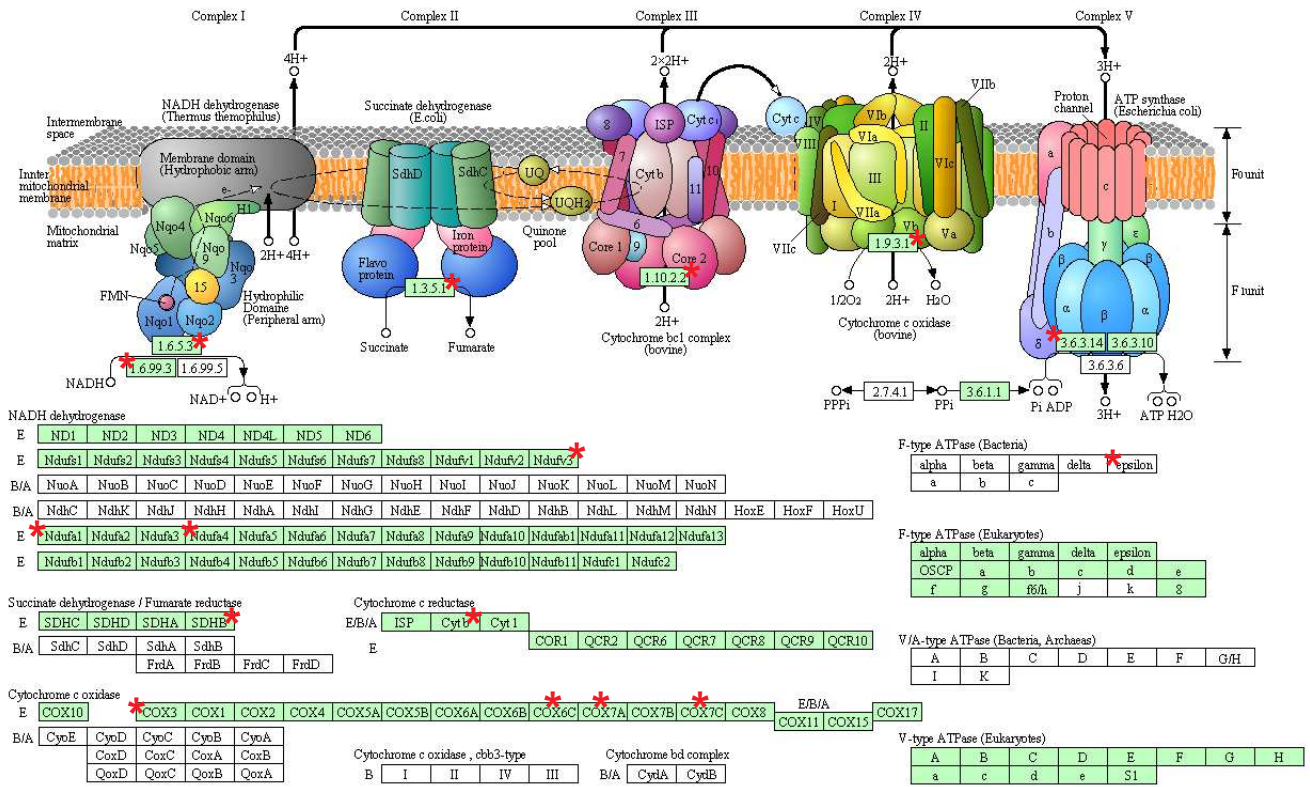

00190 5/7/14  
(c) Kanehisa Laboratories

Fig. S10

Supplement: JCSM-7-165-s011.pdf [file JCSM-7-165-s011.pdf]

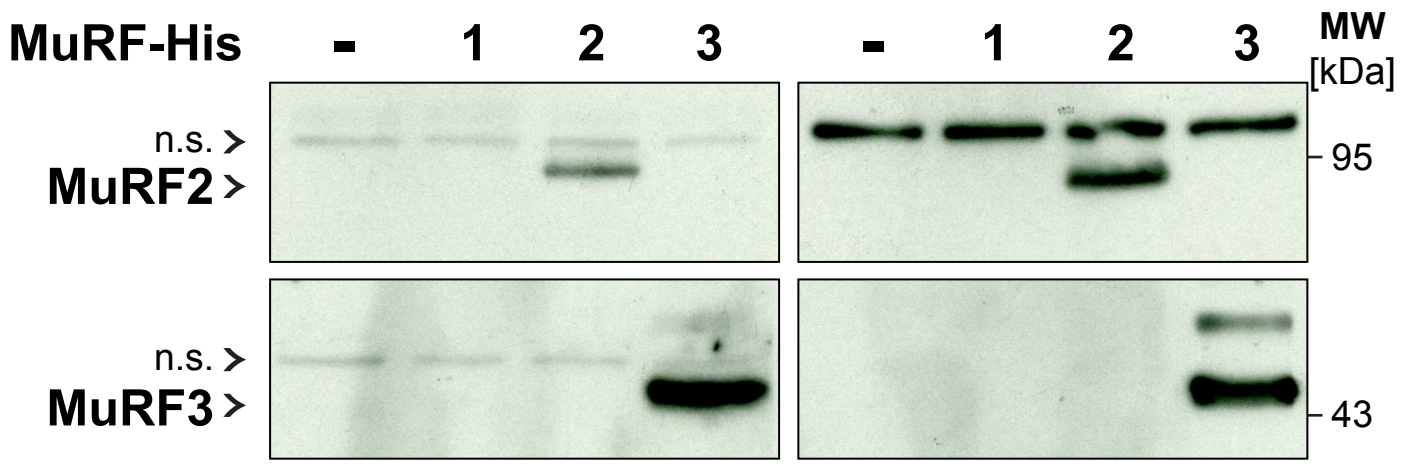

Fig. S11

Supplement: JCSM-7-165-s012.pdf [file JCSM-7-165-s012.pdf]

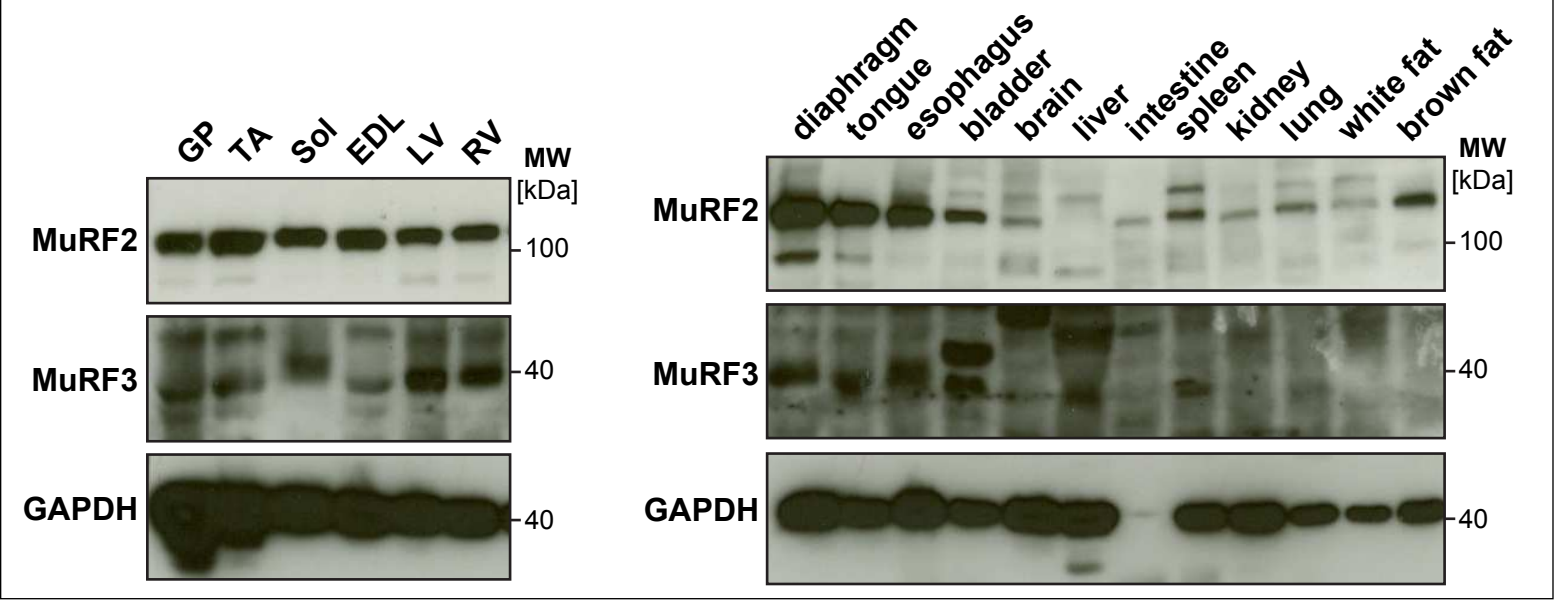

Fig. S12

Supplement: JCSM-7-165-s013.pdf [file JCSM-7-165-s013.pdf]
